# Supplementary material
Source: PubMed Central journal article supplement (PMC5485920)
Supplement: NIHMS859355-supplement-Supporting_Materials.pdf [file NIHMS859355-supplement-Supporting_Materials.pdf]

## Supporting Information

### Reverse Microemulsion-Based Synthesis of (Bis)phosphonate-Metal Materials with Controllable Physical Properties: An Example Using Zoledronic Acid-Calcium Complexes

Xu Li, Youssef W. Naguib<sup>†</sup>, Solange Valdes, Stephanie Hufnagel, and Zhengrong Cui<sup>\*</sup>

The University of Texas at Austin, College of Pharmacy, Division of Pharmaceutics, Austin, Texas, 78712.

\*Author of correspondence: Tel: (512) 495-4758, Email: [Zhengrong.cui@austin.utexas.edu](mailto:Zhengrong.cui@austin.utexas.edu).

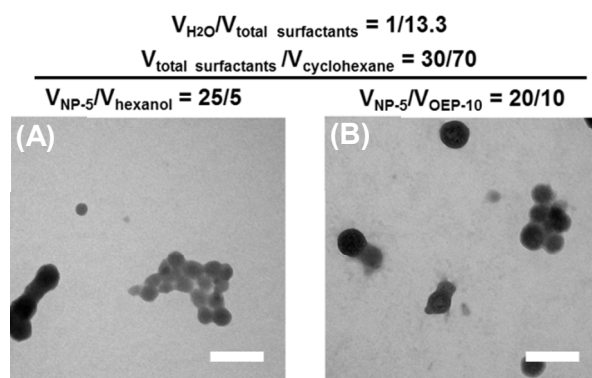

**Figure S1.** Representative TEM micrographs of Zol-Ca complexes synthesized using RM with a co-surfactant hexanol ( $V_{\text{NP-5}}/V_{\text{Hexanol}}$  of 25/5) (A) or OEP-10 ( $V_{\text{NP-5}}/V_{\text{OEP-10}}$  of 20/10) (B). The  $V_{\text{H}_2\text{O}}/V_{\text{total surfactants}}$  and  $V_{\text{total surfactants}}/V_{\text{cyclohexane}}$  ratios were fixed at 1/13.3 and 30/70, respectively (bars = 100 nm).

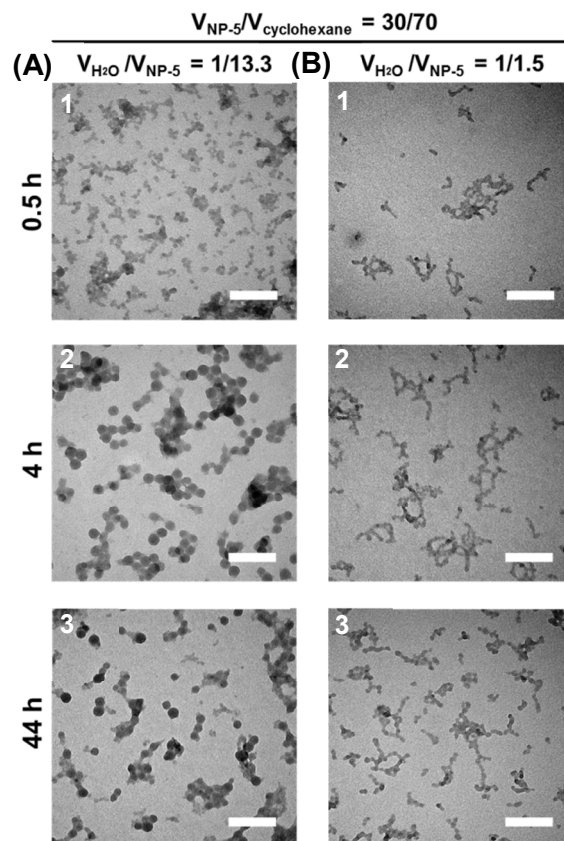

**Figure S2.** Effects of reaction time on the physical properties of Zol-Ca complexes synthesized in RM. Representative TEM images of Zol-Ca complexes prepared in RM with  $V_{\text{NP-5}}/V_{\text{cyclohexane}}$  ratio fixed at 30/70 and **(A)**  $V_{\text{H}_2\text{O}}/V_{\text{NP-5}}$  ratios of 1/13.3 or **(B)**  $V_{\text{NP-5}}/V_{\text{cyclohexane}}$  ratio of 1/1.5 (bars = 100 nm).

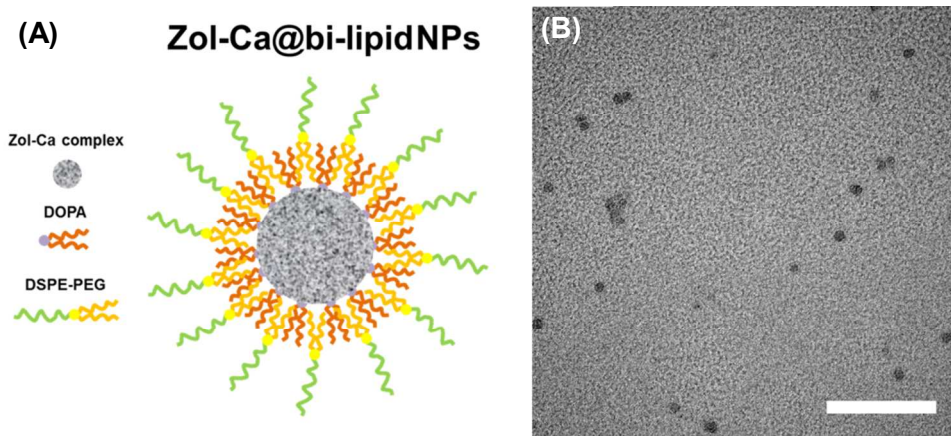

**Figure S3.** (A) The proposed structure of Zol-Ca@bi-lipid NPs. (B) The representative TEM micrograph of the Zol-Ca@bi-lipid NPs prepared with a Zol/DSPE-PEG<sub>2K</sub> weight ratio of 20  $\mu\text{g}/\text{mg}$  (bar = 200 nm).

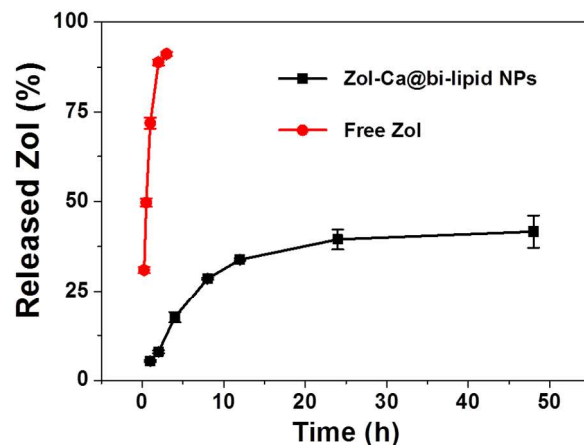

**Figure S4.** The Zol release profiles of Zol-Ca@bi-lipid NPs or free Zol in 10 mM sodium phosphate buffers with pH value of 7.4. Data are mean  $\pm$  S.D. (n = 3).

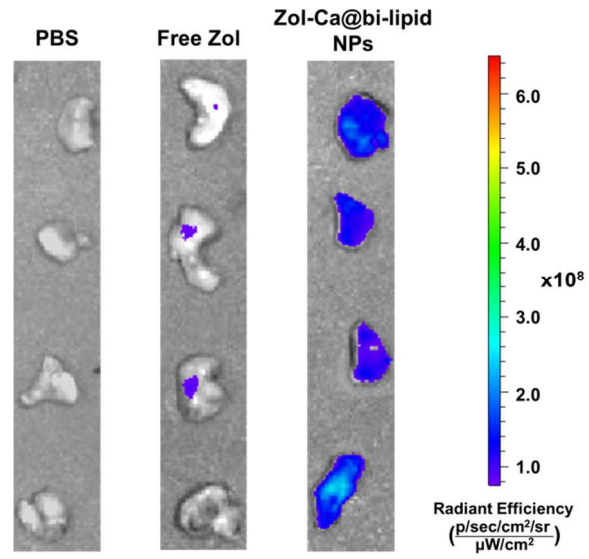

**Figure S5.** Fluorescent images of orthotopic M-Wnt tumors collected 24 h after i.v. injection of PBS, free Zol or Zol-Ca@bi-lipid NPs (2% of Zol was labelled with AF647) into C57BL/6 mice (n=4).

$$V_{\text{H}_2\text{O}}/V_{\text{NP-5}}/V_{\text{cyclohexane}} = 1/13.3/31.1; 0.45 \text{ mM DOPA}$$

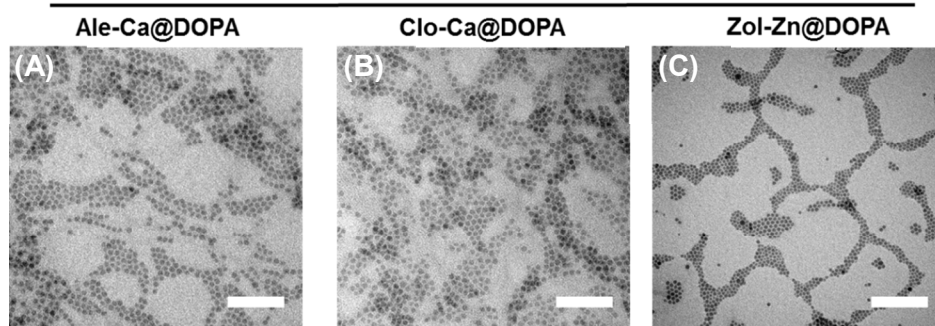

**Figure S6.** Representative TEM micrographs of DOPA-coated (A) alendronic acid-calcium (Ale-Ca@DOPA), (B) clodronic acid-calcium (Clo-Ca@DOPA) and (C) zoledronic acid-zinc (Zol-Zn@DOPA) prepared using 0.45 mM DOPA-containing RM with  $V_{\text{H}_2\text{O}}/V_{\text{total surfactants}}$  and  $V_{\text{total surfactants}}/V_{\text{cyclohexane}}$  ratios of 1/13.1 and 30/70, respectively (bars = 100 nm).

**Table S1.** The molar ratio of Ca to Zol (Ca/Zol) in Zol-Ca complexes prepared in RM system with different conditions (such as the  $V_{H_2O}/V_{NP-5}$  ratio or presence of DOPA).

| Samples                                                                                                                        |    | molar ratio of Ca/Zol | Average molar ratio of Ca/Zol (Mean $\pm$ SD, n = 3) |
|--------------------------------------------------------------------------------------------------------------------------------|----|-----------------------|------------------------------------------------------|
| <b>Spherical Zol-Ca complexes</b><br><br>( $V_{NP-5}/V_{cyclohexane}$ of 30/70;<br><br>$V_{H_2O}/V_{NP-5}$ of 1/13.3)          | 1# | 3.59                  | 3.60 $\pm$ 0.14                                      |
|                                                                                                                                | 2# | 3.46                  |                                                      |
|                                                                                                                                | 3# | 3.75                  |                                                      |
| <b>Pearl-necklace-like Zol-Ca complexes</b><br><br>( $V_{NP-5}/V_{cyclohexane}$ of 30/70;<br><br>$V_{H_2O}/V_{NP-5}$ of 1/1.5) | 1# | 2.60                  | 2.41 $\pm$ 0.17                                      |
|                                                                                                                                | 2# | 2.34                  |                                                      |
|                                                                                                                                | 3# | 2.29                  |                                                      |
| <b>Zol-Ca@DOPA composites</b><br><br>( $V_{NP-5}/V_{cyclohexane}$ of 30/70;<br><br>$V_{H_2O}/V_{NP-5}$ of 1/1.13.3)            | 1# | 6.36                  | 6.62 $\pm$ 0.55                                      |
|                                                                                                                                | 2# | 6.24                  |                                                      |
|                                                                                                                                | 3# | 7.24                  |                                                      |
